# Supplementary material
Source: PubMed Central journal article supplement (PMC3257516)

## Supplementary Data for

### **Bisubstrate analogue inhibitors of 6-hydroxymethyl-7,8-dihydropterin pyrophosphokinase: New design with improved properties**

Genbin Shi <sup>a</sup>, Gary Shaw <sup>a</sup>, Yu-He Liang <sup>a</sup>, Priadarsini Subburaman <sup>a</sup>, Yue Li <sup>b</sup>, Yan Wu <sup>b</sup>, Honggao Yan <sup>b</sup>, and Xinhua Ji <sup>a,\*</sup>

<sup>a</sup> *Macromolecular Crystallography Laboratory, National Cancer Institute, Frederick, MD 21702, USA*

<sup>b</sup> *Department of Biochemistry and Molecular Biology, Michigan State University, East Lansing, MI 48824, USA*

\* Corresponding author. Tel: +1 (301) 846-5035; Fax: +1 (301) 846-6073.

E-mail address: [jix@mail.nih.gov](mailto:jix@mail.nih.gov) (X. Ji).

*Keywords:* Antibacterial; Bisubstrate; Folate; HPPK; Pterin

## Table of Contents

|                                                                                                                 |     |
|-----------------------------------------------------------------------------------------------------------------|-----|
| <b>Figure S1.</b> $^1\text{H}$ NMR Spectrum of Compound <b>7</b> at 400 MHz in $\text{CD}_3\text{OD}$ .....     | S3  |
| <b>Figure S2.</b> $^{13}\text{C}$ NMR Spectrum of Compound <b>7</b> at 400 MHz in $\text{CD}_3\text{OD}$ .....  | S4  |
| <b>Figure S3.</b> $^1\text{H}$ NMR Spectrum of Compound <b>8</b> at 400 MHz in $\text{CD}_3\text{OD}$ .....     | S5  |
| <b>Figure S4.</b> $^{13}\text{C}$ NMR Spectrum of Compound <b>8</b> at 400 MHz in $\text{CD}_3\text{OD}$ .....  | S6  |
| <b>Figure S5.</b> $^1\text{H}$ NMR Spectrum of Compound <b>16</b> at 400 MHz in $\text{CD}_3\text{OD}$ .....    | S7  |
| <b>Figure S6.</b> $^{13}\text{C}$ NMR Spectrum of Compound <b>16</b> at 400 MHz in $\text{CD}_3\text{OD}$ ..... | S8  |
| <b>Figure S7.</b> $^1\text{H}$ NMR Spectrum of Compound <b>17</b> at 400 MHz in $\text{CD}_3\text{OD}$ .....    | S9  |
| <b>Figure S8.</b> $^{13}\text{C}$ NMR Spectrum of Compound <b>17</b> at 400 MHz in $\text{DMSO}-d_6$ .....      | S10 |
| <b>Figure S9.</b> $^1\text{H}$ NMR Spectrum of Compound <b>19</b> at 400 MHz in $\text{CD}_3\text{OD}$ .....    | S11 |
| <b>Figure S10.</b> $^{13}\text{C}$ NMR Spectrum of Compound <b>19</b> at 400 MHz in $\text{DMSO}-d_6$ .....     | S12 |

**Figure S1.**  $^1\text{H}$  NMR Spectrum of Compound **7** at 400 MHz in  $\text{CD}_3\text{OD}$

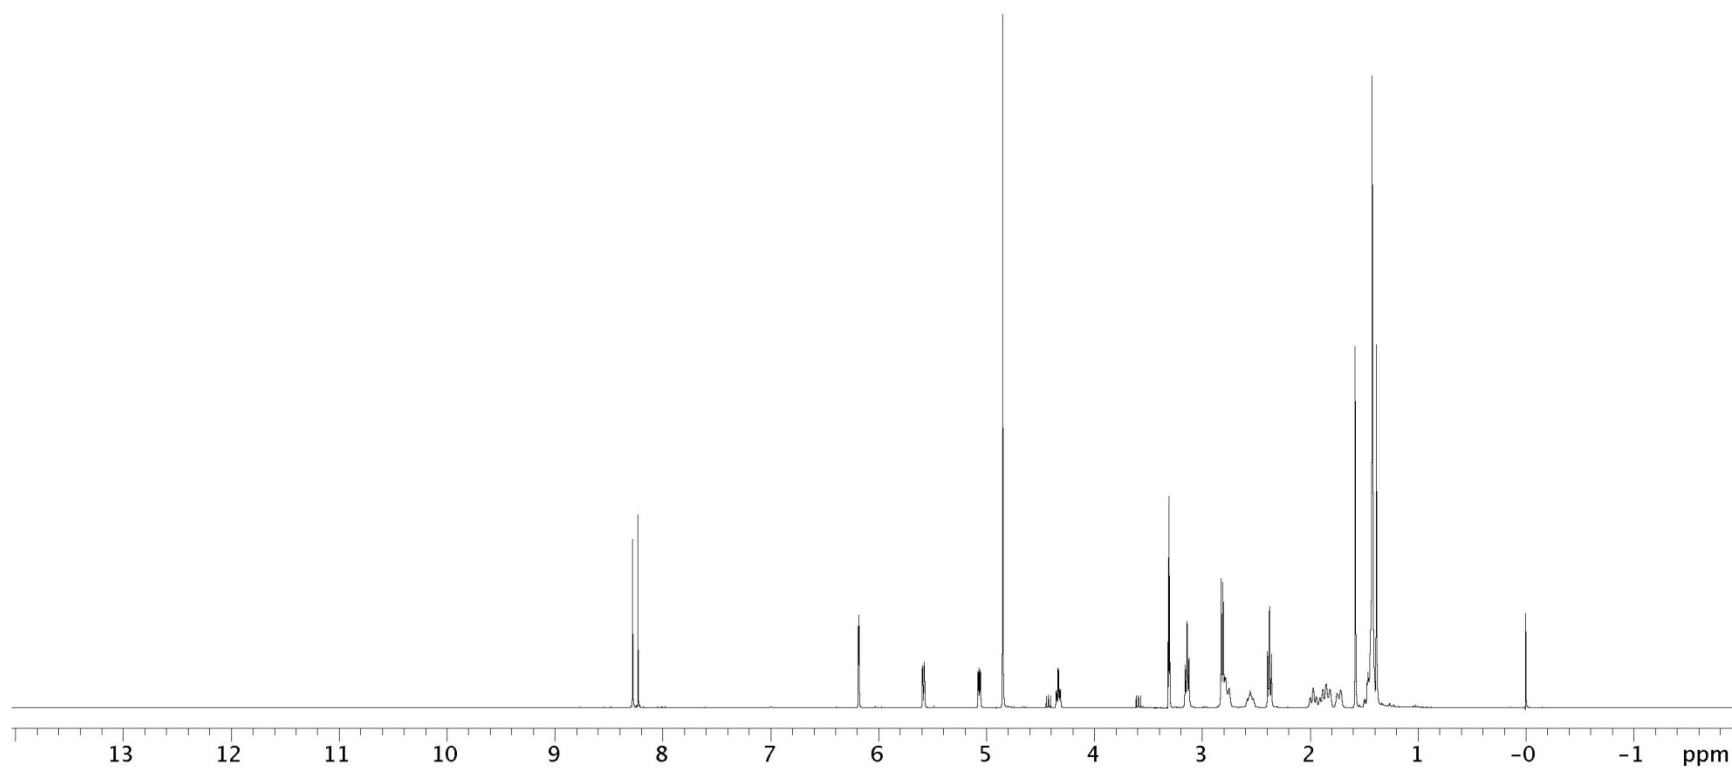

**Figure S2.**  $^{13}\text{C}$  NMR Spectrum of Compound **7** at 400 MHz in  $\text{CD}_3\text{OD}$

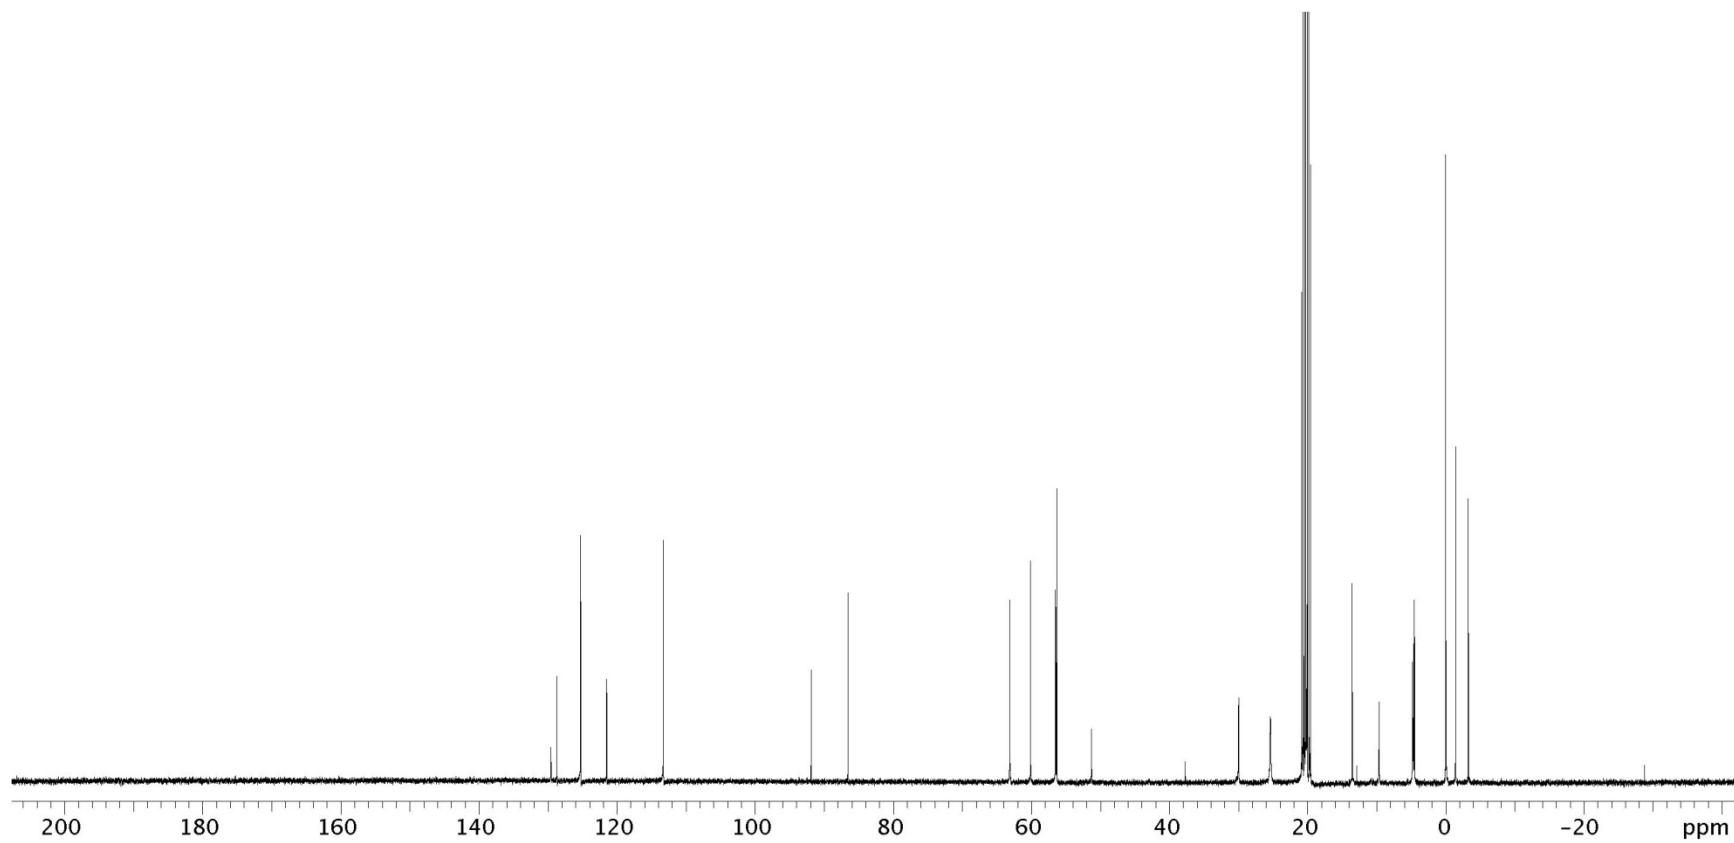

**Figure S3.**  $^1\text{H}$  NMR Spectrum of Compound **8** at 400 MHz in  $\text{CD}_3\text{OD}$

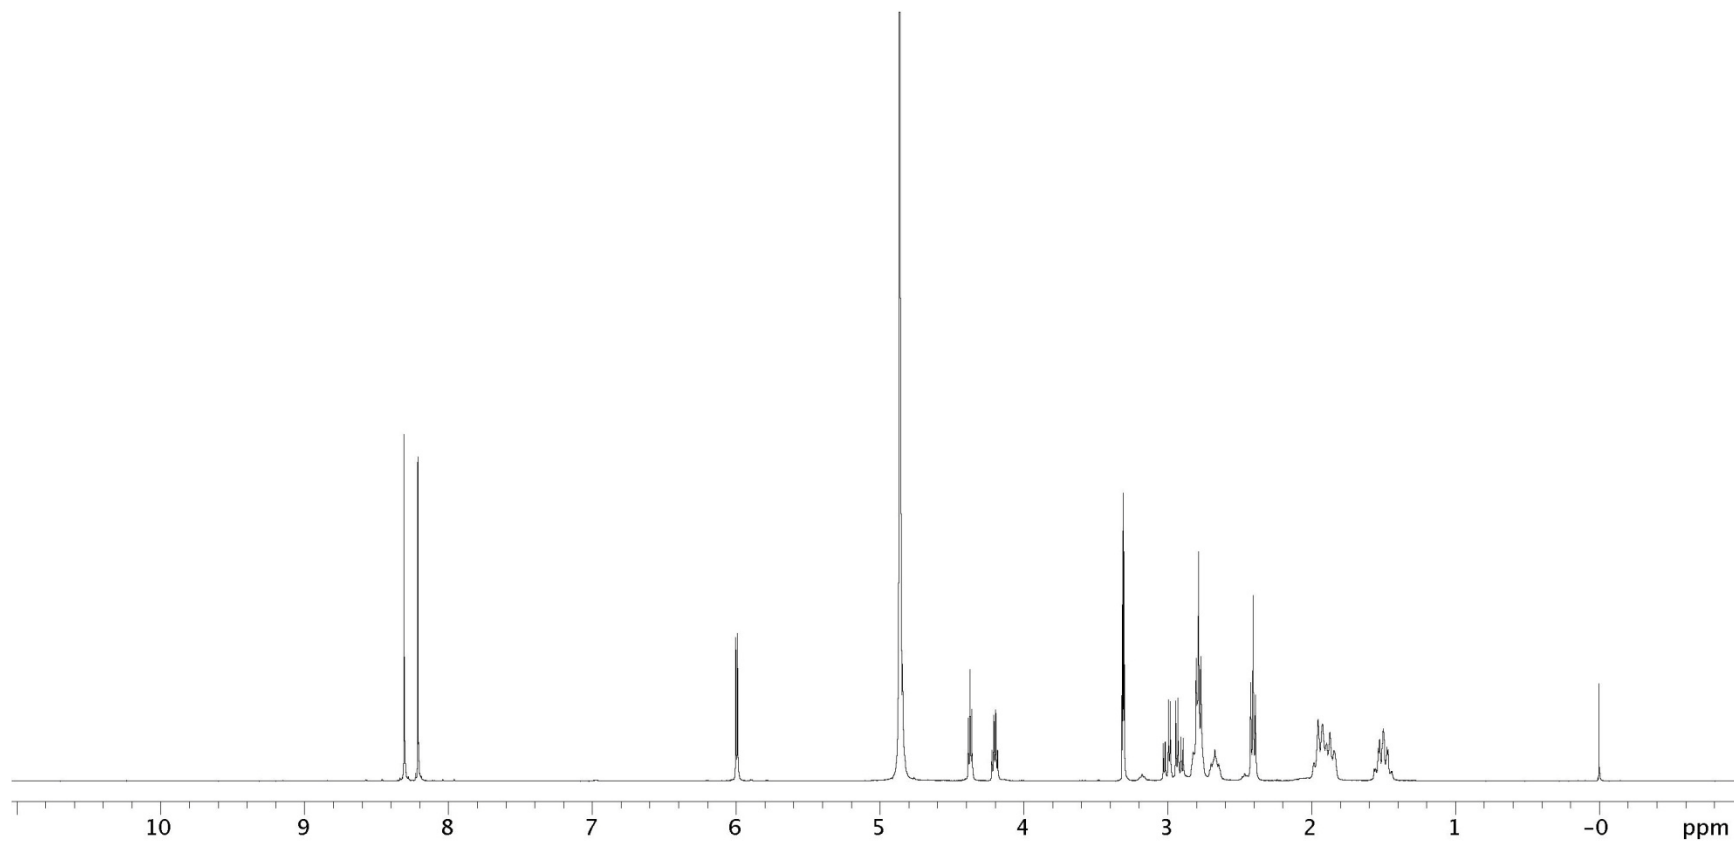

**Figure S4.**  $^{13}\text{C}$  NMR Spectrum of Compound **8** at 400 MHz in  $\text{CD}_3\text{OD}$

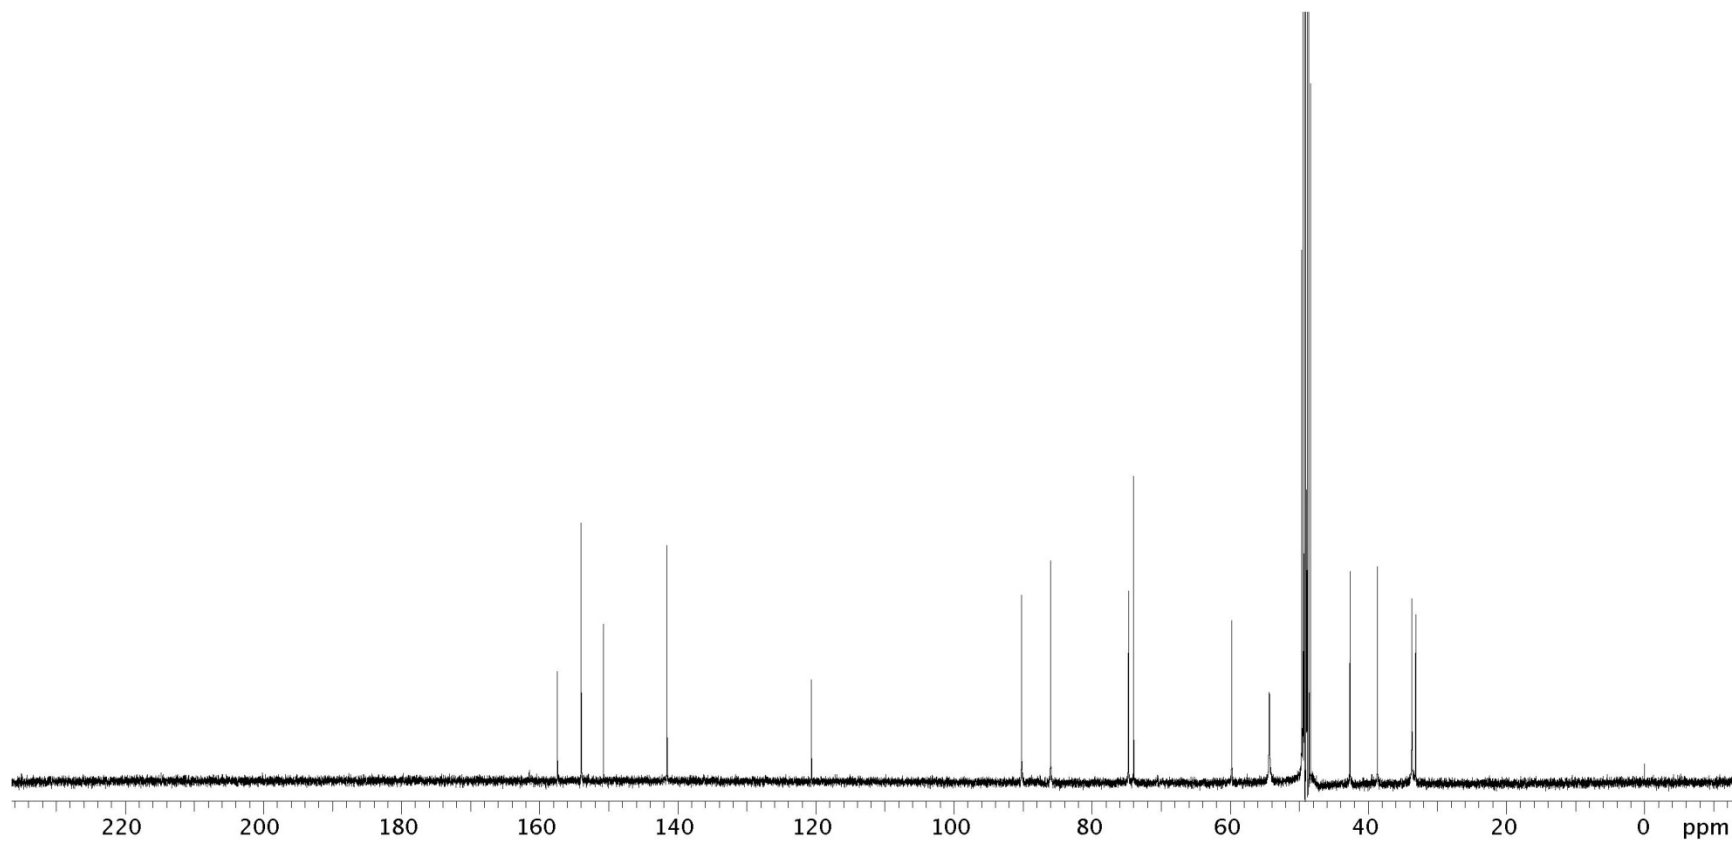

**Figure S5.**  $^1\text{H}$  NMR Spectrum of Compound **16** at 400 MHz in  $\text{CD}_3\text{OD}$

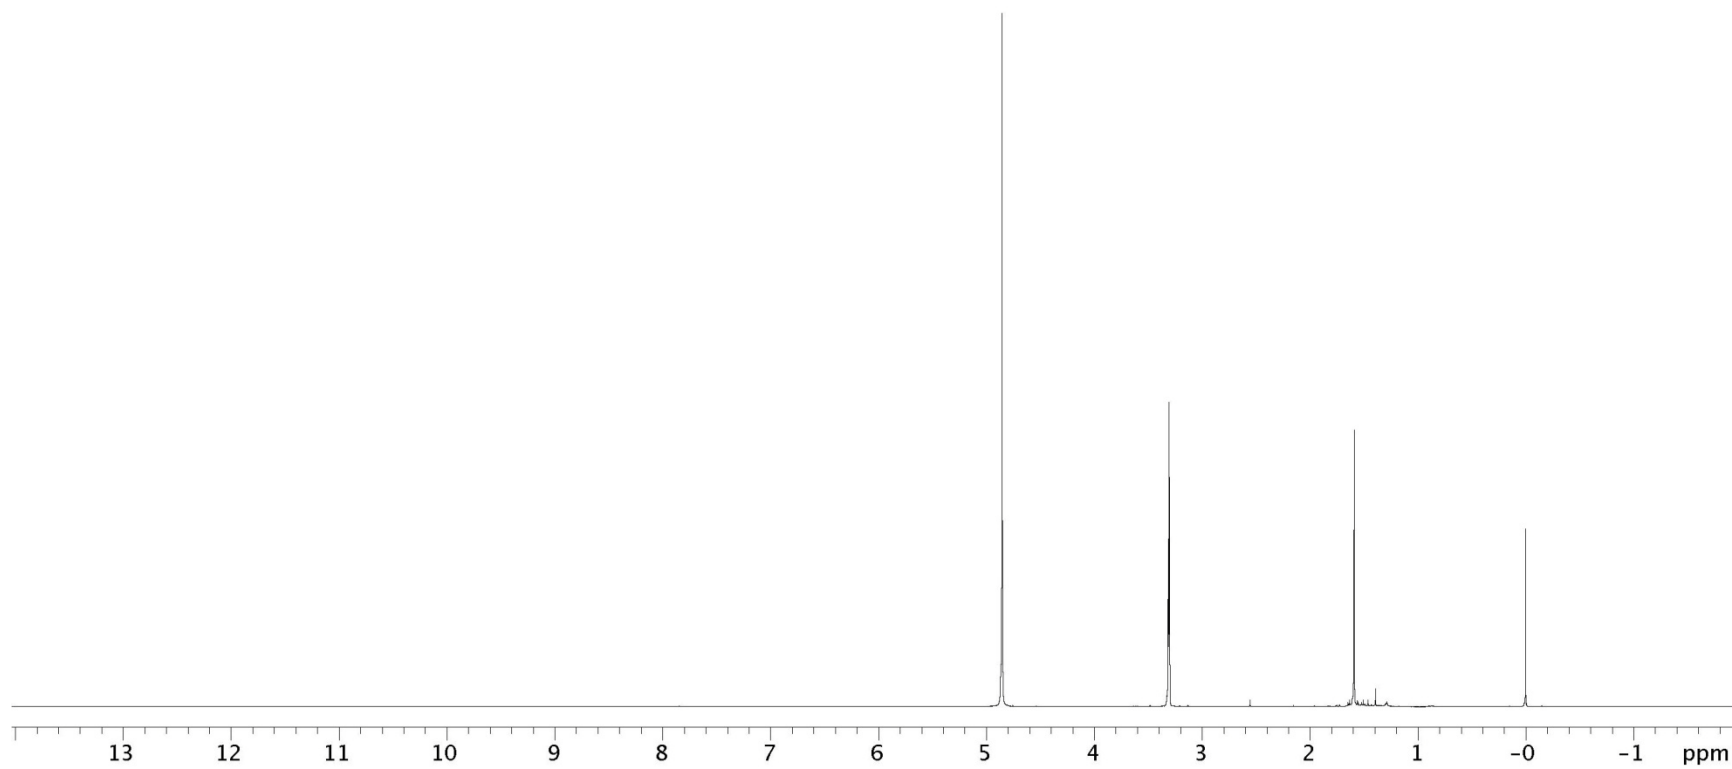

**Figure S6.**  $^{13}\text{C}$  NMR Spectrum of Compound **16** at 400 MHz in  $\text{CD}_3\text{OD}$

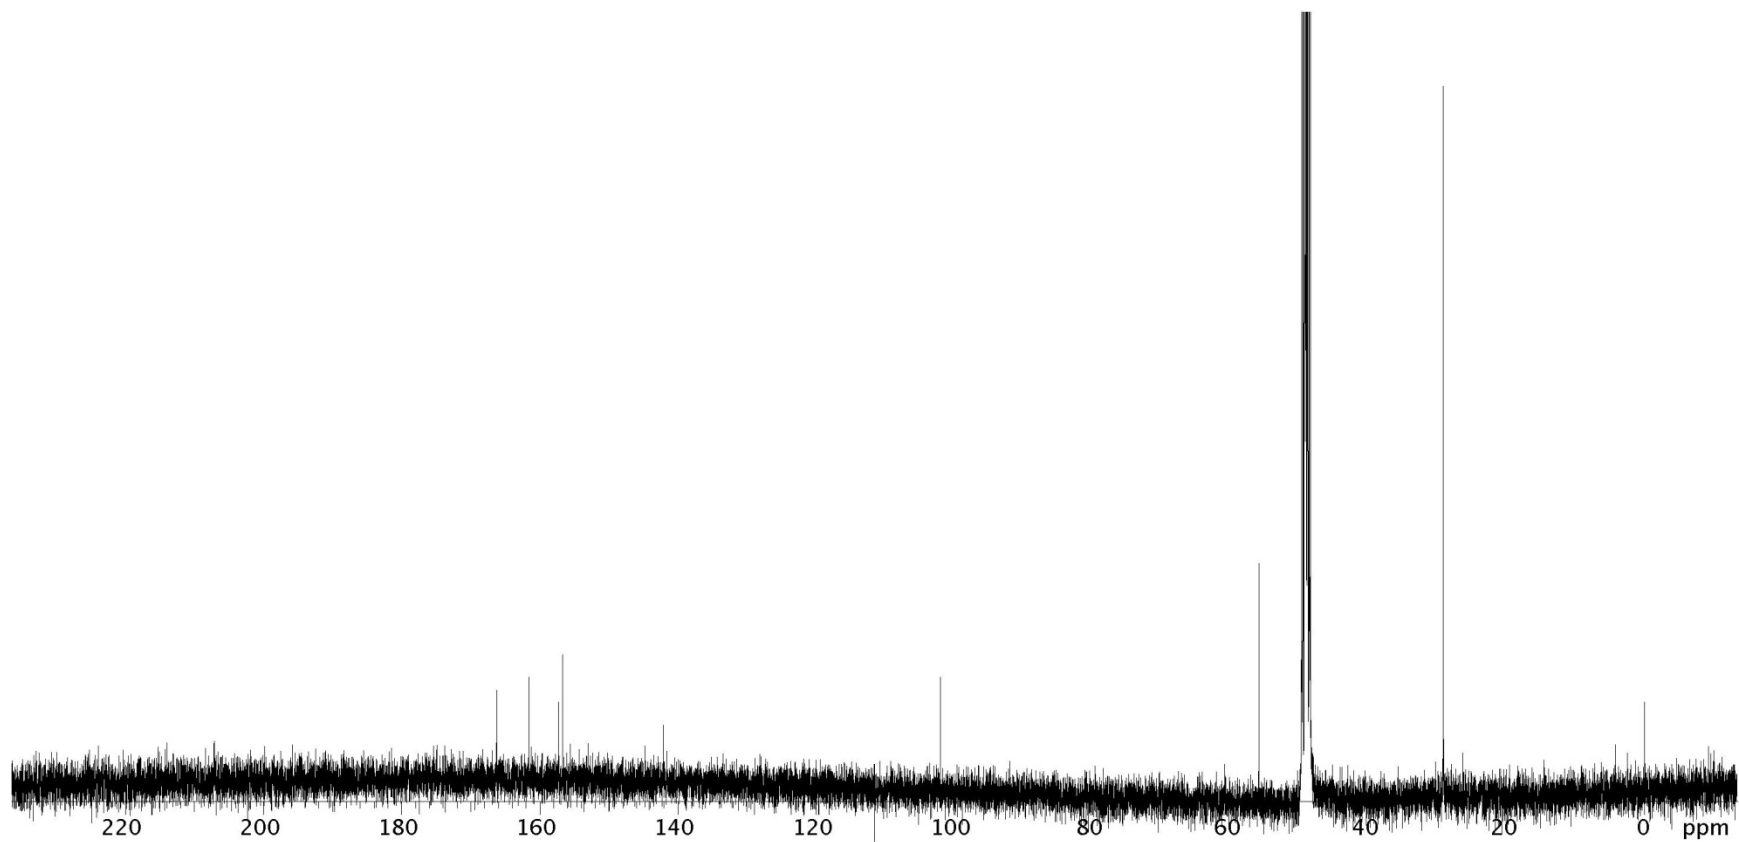



**Figure S7.**  $^1\text{H}$  NMR Spectrum of Compound **17** at 400 MHz in  $\text{CD}_3\text{OD}$

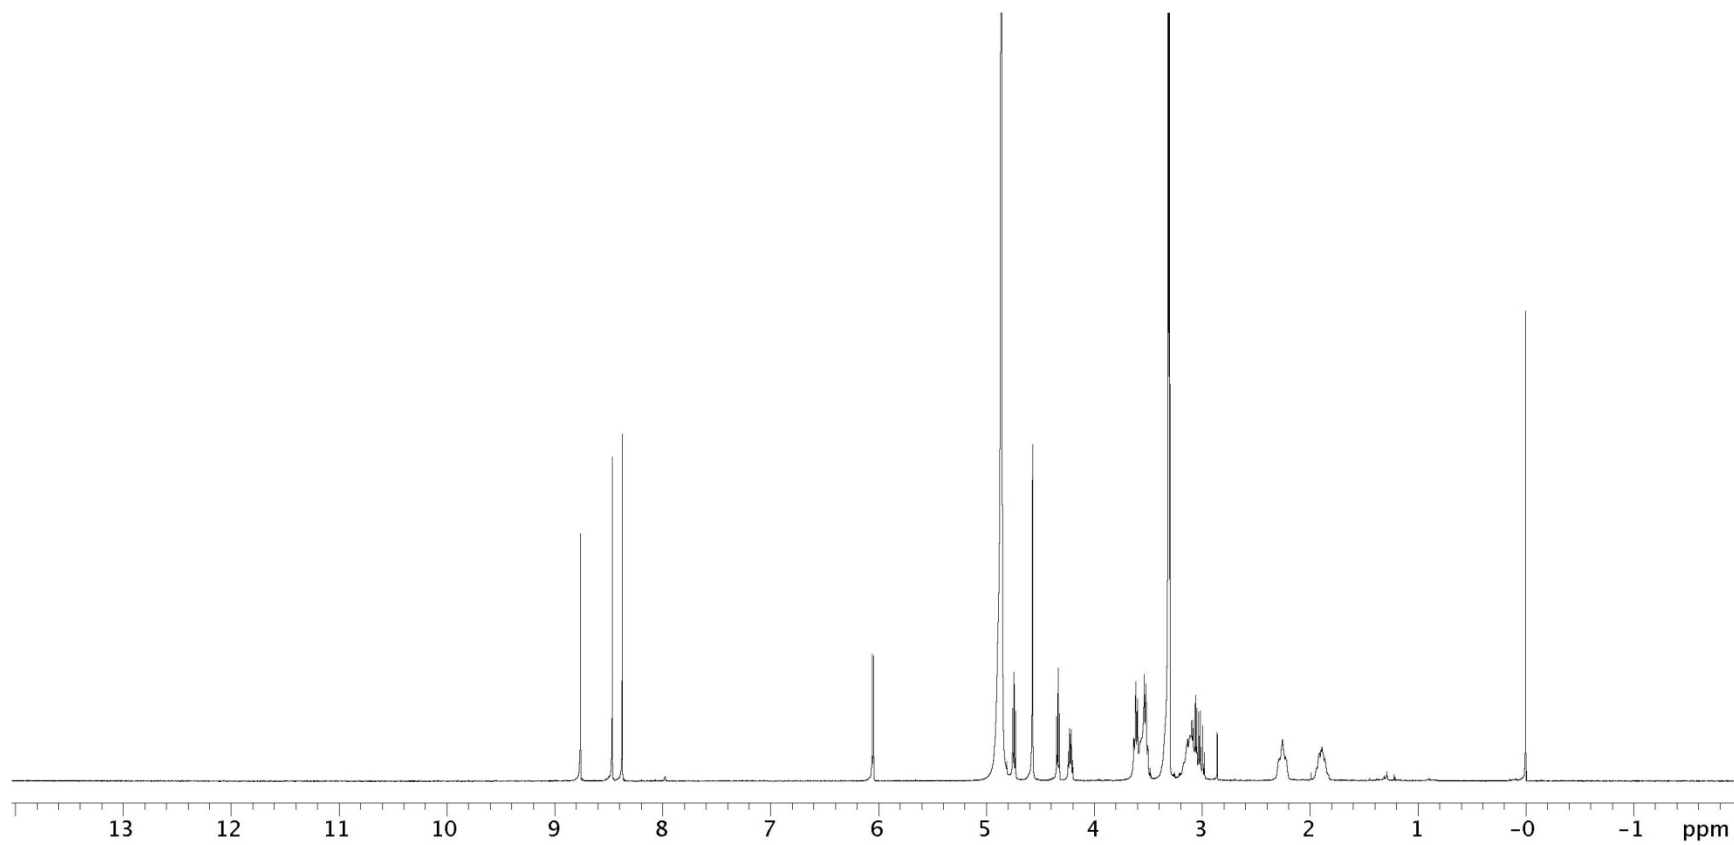

**Figure S8.**  $^{13}\text{C}$  NMR Spectrum of Compound 17 at 400 MHz in  $\text{DMSO-}d_6$

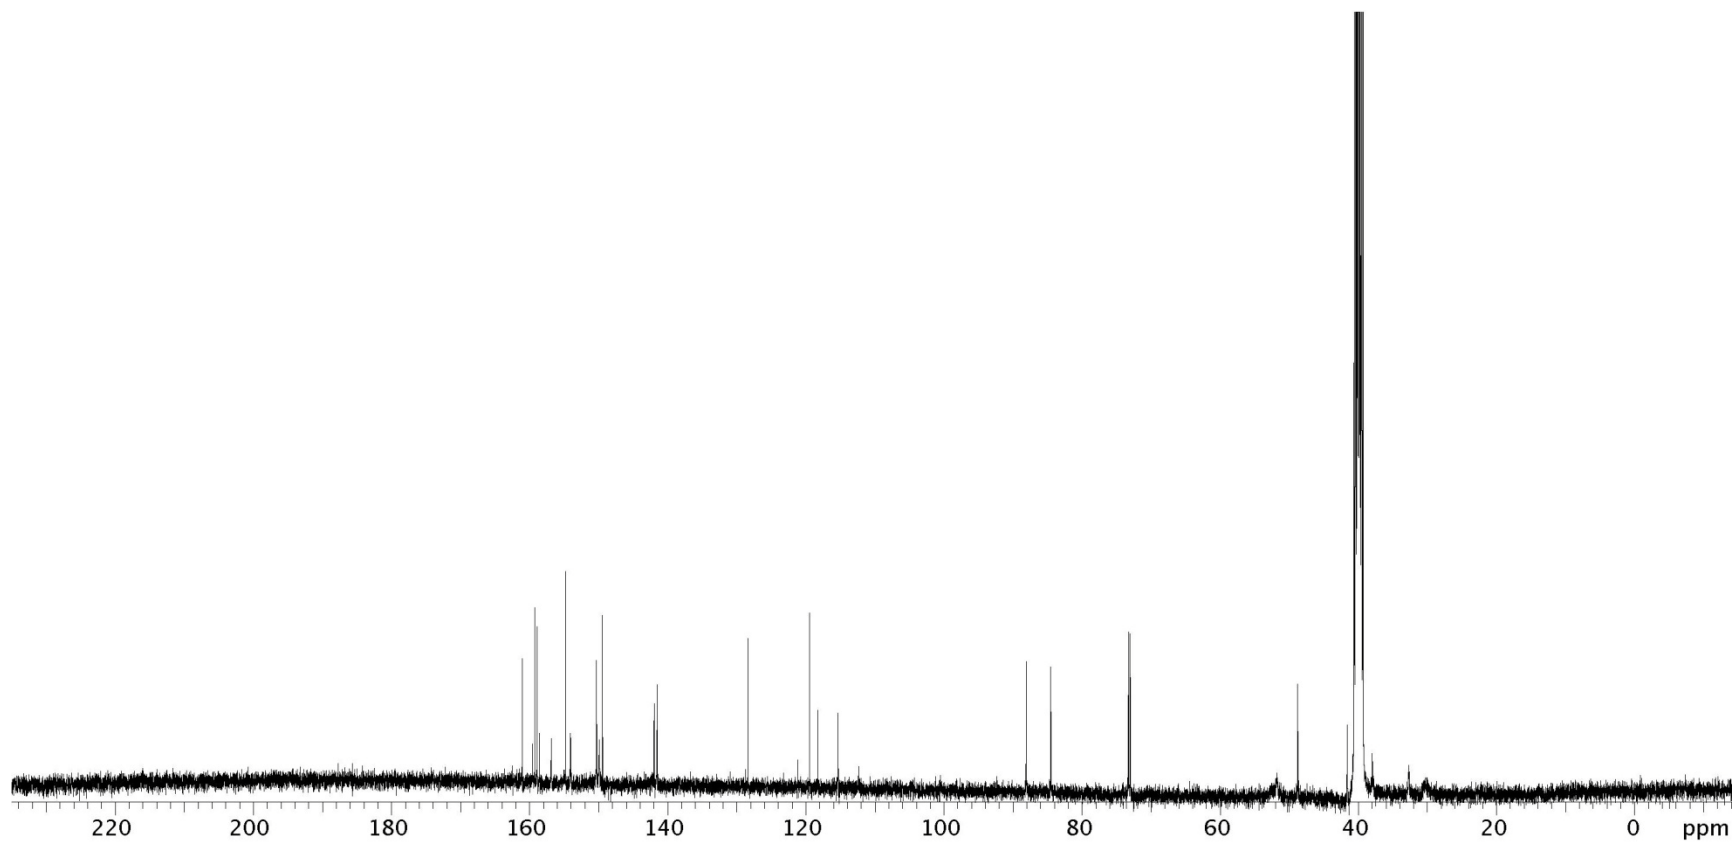

**Figure S9.**  $^1\text{H}$  NMR Spectrum of Compound **19** at 400 MHz in  $\text{CD}_3\text{OD}$

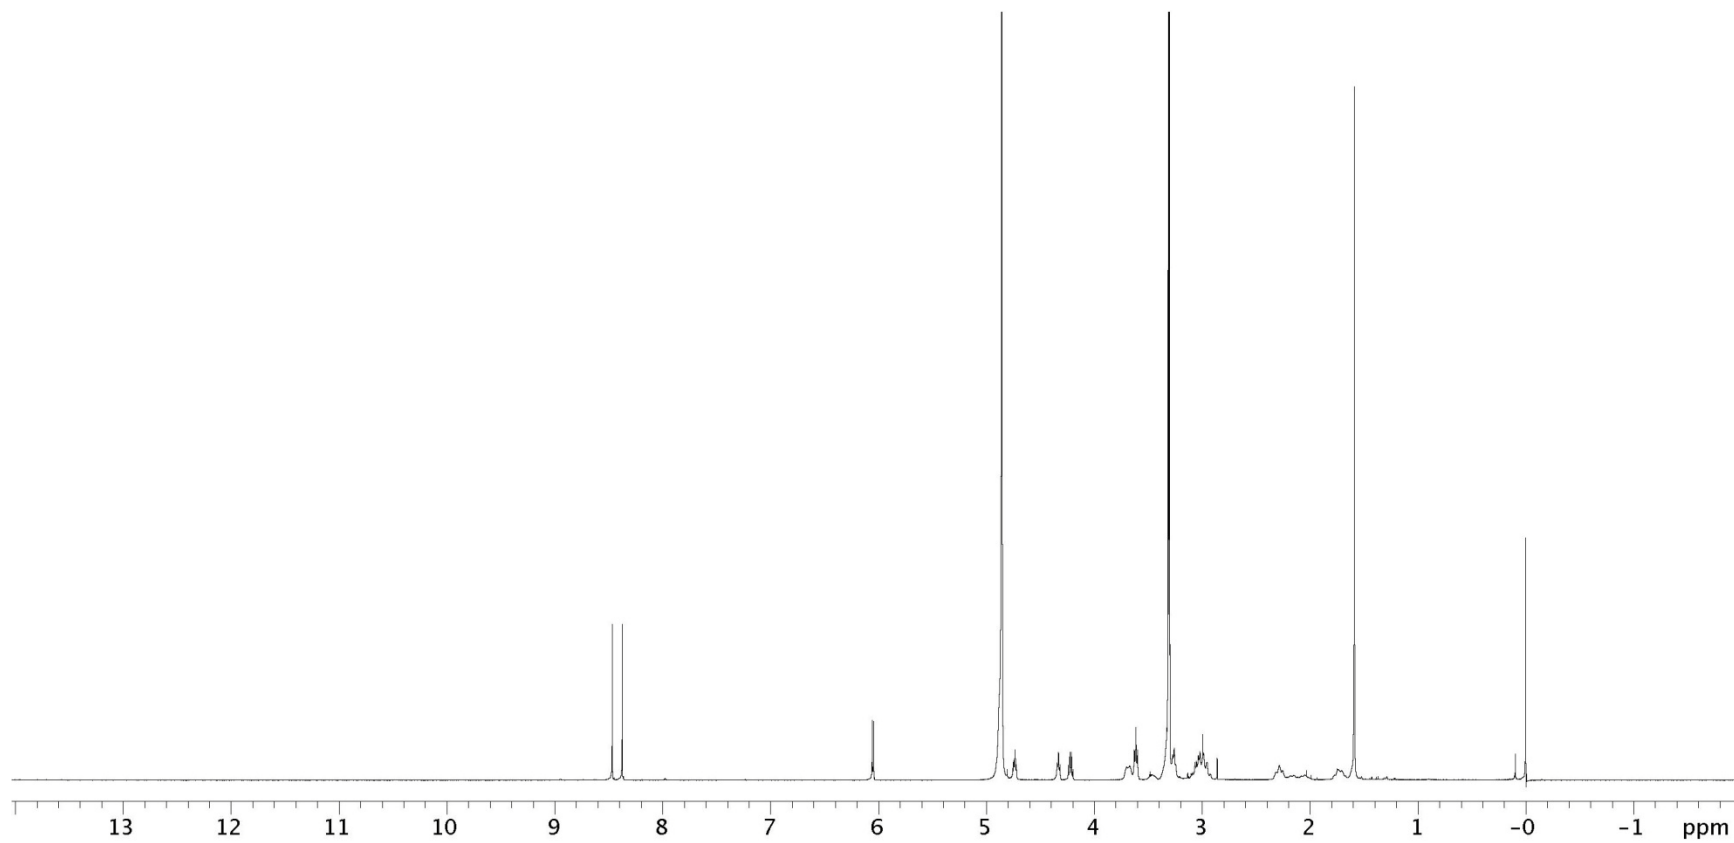

**Figure S10.**  $^{13}\text{C}$  NMR Spectrum of Compound **19** at 400 MHz in  $\text{DMSO-}d_6$

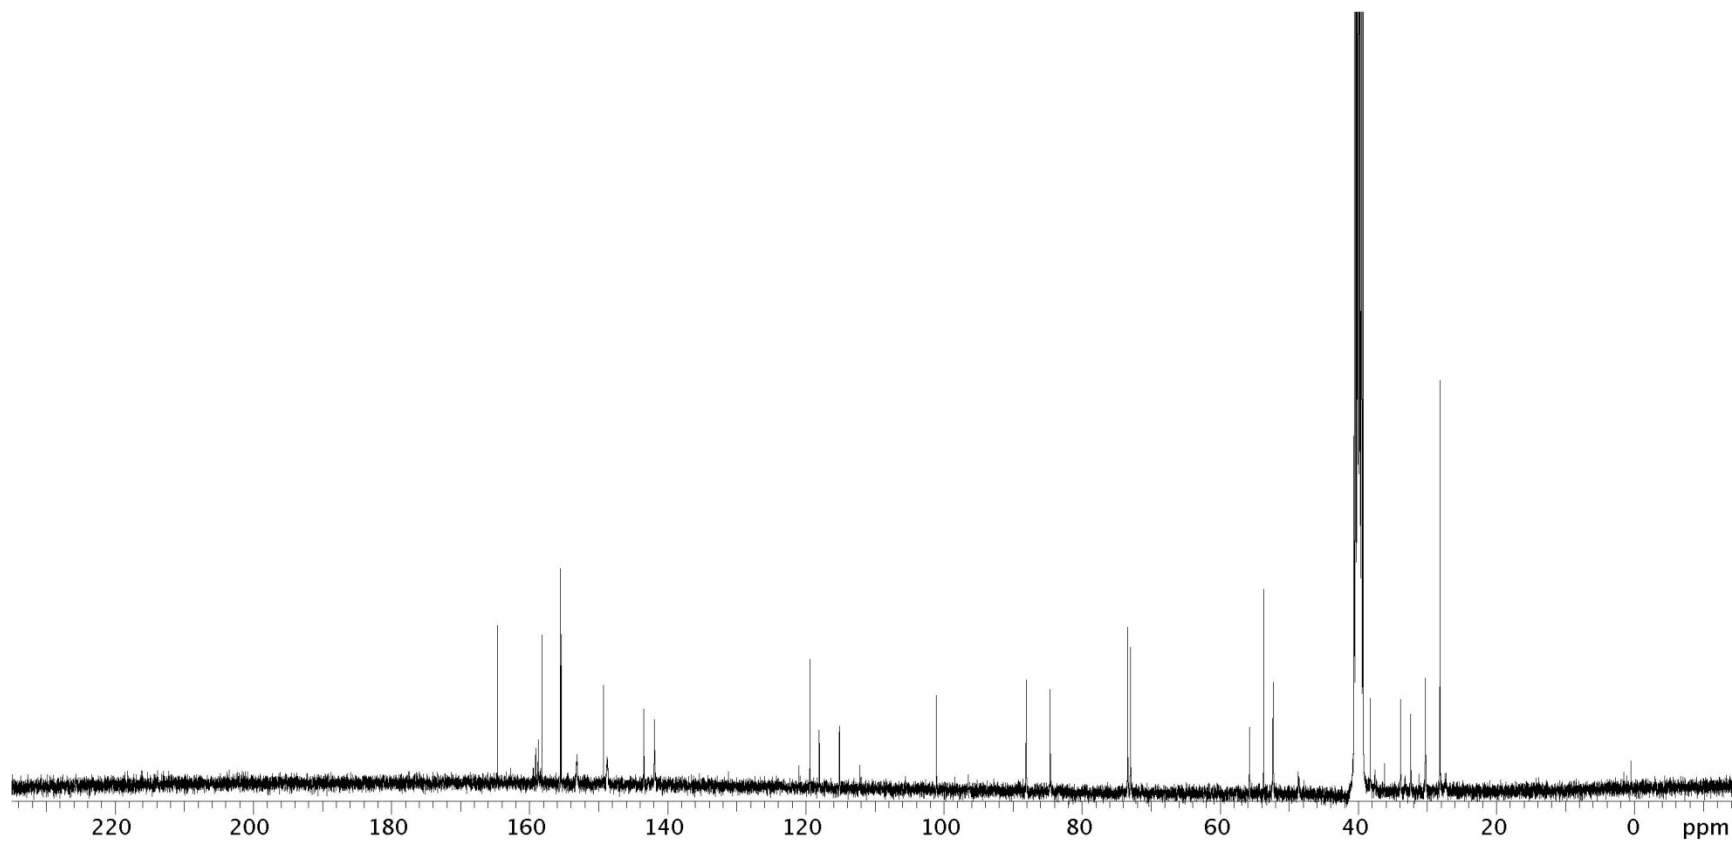

Supplement: NIHMS341314-supplement-01.pdf [file NIHMS341314-supplement-01.pdf]
